# Supplementary material for: Contributions of the RhoA guanine nucleotide exchange factor Net1 to polyoma middle T antigen-mediated mammary gland tumorigenesis and metastasis
Source: PubMed Central journal article supplement (PMC5956559; doi:10.1186/s13058-018-0966-2), 2018-05-16

*Net1*<sup>+/-</sup>, PyMT

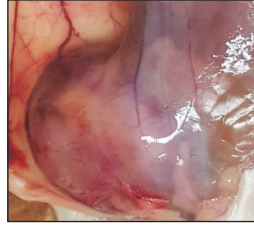

*Net1*<sup>-/-</sup>, PyMT

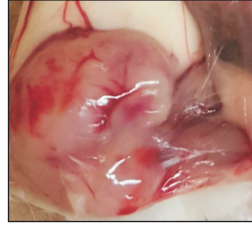

Supplement: 13058_2018_966_MOESM1_ESM.pdf [file 13058_2018_966_MOESM1_ESM.pdf]
