# Supplementary material for: Contributions of the RhoA guanine nucleotide exchange factor Net1 to polyoma middle T antigen-mediated mammary gland tumorigenesis and metastasis
Source: PubMed Central journal article supplement (PMC5956559; doi:10.1186/s13058-018-0966-2), 2018-05-16
Supplement: 13058_2018_966_MOESM3_ESM.pdf [file 13058_2018_966_MOESM3_ESM.pdf]

**Table S1. Gene expression array results**

**All genes, P<0.05**

| TargetID | Signal_X | Signal_Y | Detection1 | Detection2 | Diff_Score | p-value  | Fold_chan | Log_ratio(Probe) | SEARCH_K | ACCESSION  | PROBE_ID | DEFINITION   | SYNONYMS                                                      |
|----------|----------|----------|------------|------------|------------|----------|-----------|------------------|----------|------------|----------|--------------|---------------------------------------------------------------|
| CML3     | 22.9     | 0.4      | 0.0043     | 0.4177     | -18.0628   | 0.015621 | 0.017467  | -5.8392          | 6940753  | ILMN_221   | NM_0530  | ILMN_273     | Mus musci 4930583K21Rik; 4833414A14Rik                        |
| RAVER2   | 19.3     | 1.4      | 0.0085     | 0.3387     | -17.4767   | 0.017878 | 0.072539  | -3.7851          | 5360441  | ILMN_214   | NM_1830  | ILMN_300     | Mus musci RP23-336G7.1; A430091O22Rik                         |
| 9030224M | 20.2     | 2.6      | 0.0064     | 0.2585     | -16.5668   | 0.022046 | 0.128713  | -2.95777         | 7650272  | ILMN_209   | NM_1777  | ILMN_125     | Mus musculus RIKEN cDNA 9030224M15Rik, (9030224M15Rik),       |
| SUSTRK4  | 58.3     | 7.9      | 0          | 0.0684     | -20.1928   | 0.009566 | 0.135506  | -2.88357         | 5550274  | ILMN_219   | NM_1787  | ILMN_271     | Mus musci 6430513G13; D930039109Rik                           |
| DENND5B  | 20.7     | 2.9      | 0.0064     | 0.2489     | -14.6792   | 0.034047 | 0.140097  | -2.83551         | 2690348  | ILMN_218   | NM_1771  | ILMN_270     | Mus musci 9330160C06Rik                                       |
| CITA     | 25       | 3.9      | 0.0032     | 0.2051     | -19.8307   | 0.010398 | 0.156     | -2.68038         | 2630463  | ILMN_217   | NM_0075  | ILMN_267     | Mus musci MGC130299; C2ta; CITA                               |
| CDSN     | 31.8     | 5.1      | 0          | 0.1635     | -16.5987   | 0.021884 | 0.160377  | -2.64046         | 290333   | ILMN_198   | NM_0010  | ILMN_125     | Mus musci A1747712                                            |
| COMP     | 50.7     | 8.4      | 0          | 0.0598     | -19.1511   | 0.012159 | 0.16568   | -2.59352         | 3440538  | ILMN_224   | NM_0166  | ILMN_2773395 |                                                               |
| CPEB2    | 30.9     | 5.6      | 0          | 0.1239     | -22.1154   | 0.006144 | 0.18123   | -2.46411         | 2370707  | ILMN_191   | NM_1759  | ILMN_258     | Mus musci A630055H10Rik                                       |
| TNFRSF19 | 163.5    | 36.2     | 0          | 0          | -13.4736   | 0.044941 | 0.221407  | -2.17523         | 2060546  | ILMN_188   | NM_0138  | ILMN_279     | Mus musci Tnfrsf20; TAJ; TAJ-ALPHA; ALO23044; AW123854; Troy; |
| PRODH    | 222.7    | 49.6     | 0          | 0          | -14.5844   | 0.034798 | 0.222721  | -2.16669         | 3060400  | ILMN_213   | NM_0111  | ILMN_2636666 |                                                               |
| ATG9B    | 129.4    | 29.2     | 0          | 0.0011     | -13.3351   | 0.046397 | 0.225657  | -2.1478          | 3140682  | ILMN_249   | NM_0010  | ILMN_316     | Mus musci App9l2; Nos3as; App9l2; sONE; eONE; Appdc2; Gm574   |
| LOC38616 | 53       | 12.8     | 0          | 0.0214     | -13.1651   | 0.048249 | 0.241509  | -2.04985         | 6400364  | ILMN_200   | XM_35910 | ILMN_1236603 |                                                               |
| N4BP2    | 48.4     | 12       | 0          | 0.0256     | -27.6138   | 0.001732 | 0.247934  | -2.01957         | 6770367  | ILMN_261   | NM_0010  | ILMN_297     | Mus musci Gm868; E43001416; N4bp2; Gm1791                     |
| SLC20A1  | 21.2     | 5.6      | 0.0053     | 0.1335     | -13.1338   | 0.048598 | 0.264151  | -1.92107         | 1340240  | ILMN_206   | AK084159 | ILMN_1247410 |                                                               |
| Gm684    | 64.6     | 19.5     | 0          | 0.0075     | -31.0779   | 0.00078  | 0.301858  | -1.72806         | 2100022  | ILMN_198   | NM_92486 | ILMN_121     | PREDICTED: Mus musculus gene model 684, (NCBI) (Gm684), mRN   |
| ZMYND10  | 42.9     | 13.1     | 0          | 0.0235     | -17.2981   | 0.018629 | 0.305361  | -1.71141         | 7510273  | ILMN_185   | NM_0532  | ILMN_125     | Mus musci Blu                                                 |
| SLCSA5   | 59.5     | 18.3     | 0          | 0.0128     | -13.0524   | 0.049518 | 0.307563  | -1.70105         | 270086   | ILMN_186   | NM_0532  | ILMN_1245214 |                                                               |
| KCAP2L   | 41.5     | 13       | 0          | 0.0224     | -19.0591   | 0.012419 | 0.313253  | -1.6746          | 2450270  | ILMN_214   | NM_1815  | ILMN_123     | Mus musci 2610318C08Rik; AV070319; 2010016H04Rik              |
| KCNA6    | 149.3    | 46.8     | 0          | 0          | -24.2006   | 0.003801 | 0.313463  | -1.67363         | 7000487  | ILMN_209   | NM_0135  | ILMN_2596385 |                                                               |
| ID12     | 30.6     | 9.6      | 0          | 0.0491     | -13.9427   | 0.040339 | 0.313725  | -1.67243         | 2320356  | ILMN_217   | NM_1771  | ILMN_121     | Mus musci IPP12; 4833405L16Rik                                |
| GSG1L    | 97.9     | 30.8     | 0          | 0          | -36.6985   | 0.000214 | 0.314607  | -1.66838         | 5700164  | ILMN_189   | XM_91462 | ILMN_246     | PREDICTED: Mus musculus GSG1L-like (Gsg1l), mRNA.             |
| LRP8     | 48.3     | 15.6     | 0          | 0.016      | -23.4586   | 0.00451  | 0.322981  | -1.63048         | 5960131  | ILMN_204   | NM_0010  | ILMN_124     | Mus musci Lr8b; 4932703M08Rik; apoER2                         |
| ZFP276   | 48.5     | 16.3     | 0          | 0.0139     | -23.4999   | 0.004467 | 0.336082  | -1.57311         | 1770349  | ILMN_187   | NM_0204  | ILMN_1222031 |                                                               |
| CDC25A   | 52.3     | 17.8     | 0          | 0.0128     | -20.463    | 0.008989 | 0.340344  | -1.55493         | 3440100  | ILMN_189   | NM_0076  | ILMN_277     | Mus musci D9ErtD393e                                          |
| DNAUC14  | 27.2     | 9.3      | 0.0021     | 0.0491     | -13.8976   | 0.040761 | 0.341912  | -1.5483          | 2370594  | ILMN_222   | NM_0288  | ILMN_275     | Mus musci DNJ; LIP6; HDJ3; DRIP78; 5730551F12Rik              |
| PITPNM3  | 25.7     | 8.8      | 0.0032     | 0.0598     | -13.2337   | 0.047493 | 0.342412  | -1.54619         | 1340167  | ILMN_256   | NM_0010  | ILMN_311     | Mus musci A1848332; A330068P14Rik; Gm880                      |
| ATM      | 33.6     | 12.3     | 0          | 0.0235     | -14.4862   | 0.035594 | 0.366071  | -1.4498          | 4560551  | ILMN_214   | NM_0074  | ILMN_278     | Mus musci C030026E19Rik; A1256621                             |
| PCDH21   | 1318.2   | 486      | 0          | 0          | -43.8866   | 4.09E-05 | 0.368685  | -1.43954         | 2060296  | ILMN_216   | NM_1308  | ILMN_298     | Mus musci KIAA1775; Prcad                                     |
| EXTL1    | 202.1    | 76.1     | 0          | 0          | -20.4388   | 0.009039 | 0.376546  | -1.4091          | 1340133  | ILMN_185   | NM_0195  | ILMN_1215877 |                                                               |
| SLC27A3  | 143.9    | 55.9     | 0          | 0          | -21.6015   | 0.006916 | 0.388464  | -1.36415         | 6660747  | ILMN_222   | NM_1309  | ILMN_2747857 |                                                               |
| SLC38A3  | 46.2     | 18.2     | 0          | 0.0107     | -17.2512   | 0.018831 | 0.393939  | -1.34395         | 6100154  | ILMN_222   | NM_0238  | ILMN_279     | Mus musci Slc38-3; 0610012J02Rik; Nat1; D9Ucla2               |
| 1700013G | 55       | 22       | 0          | 0.0032     | -15.7845   | 0.026397 | 0.4       | -1.32193         | 4070497  | ILMN_196   | XM_8895  | ILMN_122     | PREDICTED: Mus musculus RIKEN cDNA 1700013G10 gene (17000     |
| EXTL1    | 297.3    | 120.9    | 0          | 0          | -14.0799   | 0.039085 | 0.40666   | -1.29811         | 7210669  | ILMN_258   | NM_0195  | ILMN_287     | Mus musci D430033M16Rik                                       |
| ADORA1   | 108.1    | 44.1     | 0          | 0          | -22.3925   | 0.005764 | 0.407956  | -1.29352         | 7510408  | ILMN_216   | NM_0010  | ILMN_125     | Mus musci A1AR; A1R; BB176431; A1848715                       |
| C630028N | 71.4     | 29.3     | 0          | 0.0011     | -13.3655   | 0.046073 | 0.410364  | -1.28502         | 2570100  | ILMN_259   | NM_1773  | ILMN_296     | Mus musculus RIKEN cDNA C630028N24 gene (C630028N24Rik), r    |
| CML4     | 133.3    | 57       | 0          | 0          | -19.3409   | 0.011639 | 0.427607  | -1.22564         | 3170255  | ILMN_223   | NM_0234  | ILMN_121     | Mus musci 0610037016Rik                                       |
| TRP6     | 429.2    | 186      | 0          | 0          | -18.0675   | 0.015605 | 0.433364  | -1.20635         | 580064   | ILMN_189   | NM_0116  | ILMN_121     | Mus musci p51/p63; Ket; TAp63; p63; MGC115972; A1462811; Trp  |
| IL20RB   | 306.6    | 135.3    | 0          | 0          | -16.5995   | 0.02188  | 0.441292  | -1.1802          | 5050753  | ILMN_246   | NM_0010  | ILMN_304     | Mus musci MGC130209; Fndc6; AV228068; Gm186                   |
| RFTN2    | 40.9     | 18.4     | 0          | 0.0118     | -14.7577   | 0.033437 | 0.449878  | -1.1524          | 6590243  | ILMN_186   | NM_0287  | ILMN_121     | Mus musci 3222401M22Rik; KIAA0084; 2700010E02Rik              |
| MICALL2  | 98.3     | 44.6     | 0          | 0          | -23.7376   | 0.004429 | 0.453713  | -1.14015         | 6650349  | ILMN_192   | NM_1748  | ILMN_271     | Mus musci J1RAB; MICAL-L2; A930021H16Rik; FJ100139; mFLU0013  |
| TCFAP2C  | 332      | 153.7    | 0          | 0          | -15.4516   | 0.0285   | 0.462952  | -1.11107         | 3780711  | ILMN_223   | NM_0093  | ILMN_123     | Mus musci AA409384; Ap-2.2                                    |
| ZFP295   | 46.1     | 21.6     | 0          | 0.0053     | -15.1936   | 0.030244 | 0.468547  | -1.09374         | 5420756  | ILMN_192   | NM_0010  | ILMN_125     | Mus musci Znf295; B430213I24Rik; 5430437K12Rik; mKIAA1227     |
| CRISPLD2 | 258.9    | 122.3    | 0          | 0          | -19.5044   | 0.011209 | 0.472383  | -1.08197         | 3780102  | ILMN_208   | NM_0302  | ILMN_125     | Mus musci Lcrisp2; MGC116029; 1810049K24Rik                   |
| PIK3R3   | 157.7    | 74.5     | 0          | 0          | -19.8981   | 0.010237 | 0.472416  | -1.08187         | 1400184  | ILMN_212   | NM_1815  | ILMN_124     | Mus musci p55pik; AA414954                                    |
| D12ERTD5 | 132      | 62.4     | 0          | 0          | -21.342    | 0.007342 | 0.472727  | -1.08092         | 610491   | ILMN_244   | NM_0297  | ILMN_298     | Mus musci 2410157M17Rik; 9630047E15                           |
| KRT5     | 130.4    | 62.1     | 0          | 0          | -15.2165   | 0.030085 | 0.476227  | -1.07028         | 7150326  | ILMN_221   | NM_0270  | ILMN_274     | Mus musci AW146334; Krt2-5; K5; 330001P10Rik; Tfpb8           |
| POLD1    | 327.5    | 156.5    | 0          | 0          | -17.3573   | 0.018377 | 0.477863  | -1.06533         | 5220358  | ILMN_215   | NM_0111  | ILMN_265     | Mus musci 125Kda                                              |
| USP37    | 62.2     | 30.1     | 0          | 0          | -17.382    | 0.018273 | 0.483293  | -1.04715         | 4210576  | ILMN_184   | NM_1769  | ILMN_123     | Mus musci 4932415L06Rik; C330008N13Rik                        |
| KCNA6    | 96.1     | 46.8     | 0          | 0          | -16.4536   | 0.022628 | 0.486993  | -1.03803         | 3140612  | ILMN_209   | NM_0135  | ILMN_2760927 |                                                               |
| LOC38061 | 84.4     | 41.3     | 0          | 0          | -13.4513   | 0.045172 | 0.489336  | -1.0311          | 2100561  | ILMN_198   | XM_14964 | ILMN_1213986 |                                                               |
| BACE1    | 469.7    | 230.2    | 0          | 0          | -26.9024   | 0.002041 | 0.4901    | -1.02885         | 580446   | ILMN_215   | NM_0117  | ILMN_121     | Mus musci C76936                                              |
| DYSF     | 68.7     | 34       | 0          | 0          | -17.5131   | 0.017729 | 0.494905  | -1.01478         | 7610398  | ILMN_229   | NM_0214  | ILMN_313     | Mus musci mFLU00175; 2310004N10Rik; D6p3s; A1604795           |
| PAPLN    | 928.9    | 461.9    | 0          | 0          | -19.116    | 0.012257 | 0.497255  | -1.00794         | 2680672  | ILMN_219   | NM_1308  | ILMN_270     | Mus musci E030033C16Rik                                       |
| ORF19    | 62.5     | 31.1     | 0          | 0          | -13.9805   | 0.03999  | 0.4976    | -1.00694         | 7150112  | ILMN_210   | NM_0268  | ILMN_124     | Mus musci 1110049F14Rik                                       |
| ZFP334   | 50.6     | 25.2     | 0          | 0.0011     | -14.6331   | 0.03441  | 0.498024  | -1.00571         | 6060521  | ILMN_184   | NM_1784  | ILMN_285     | Mus musci MGC27911; D2ErdD535e                                |
| TUBE1    | 54.3     | 27.2     | 0          | 0.0011     | -15.1068   | 0.030855 | 0.500921  | -0.99735         | 2600475  | ILMN_252   | NM_0280  | ILMN_316     | Mus musci 2310061K05Rik; Tube; A1551343                       |
| C330016O | 46.6     | 23.4     | 0          | 0.0032     | -13.6623   | 0.04303  | 0.502146  | -0.99382         | 4070017  | ILMN_217   | NM_1459  | ILMN_2685222 |                                                               |
| BEX4     | 119.8    | 60.3     | 0          | 0          | -17.0809   | 0.019584 | 0.503339  | -0.9904          | 1410619  | ILMN_231   | NM_1214  | ILMN_304     | Mus musculus brain expressed gene 4 (Bex4), mRNA.             |
| ZFP296   | 69.6     | 35.1     | 0          | 0          | -15.2653   | 0.029749 | 0.50431   | -0.98762         | 5670154  | ILMN_190   | NM_0224  | ILMN_291     | Mus musci 2210018A16Rik                                       |
| 6430548M | 505.5    | 258.9    | 0          | 0          | -20.455    | 0.009005 | 0.512166  | -0.96532         | 7160070  | ILMN_188   | NM_1722  | ILMN_1219474 |                                                               |
| SIDT1    | 715.9    | 366.8    | 0          | 0          | -14.435    | 0.036016 | 0.512362  | -0.96476         | 870156   | ILMN_218   | NM_1980  | ILMN_124     | Mus musci B830021E24Rik; AW045928                             |
| SLC30A2  | 128.4    | 66.1     | 0          | 0          | -15.3175   | 0.029393 | 0.514798  | -0.95792         | 5130598  | ILMN_220   | XM_1317  | ILMN_2718910 |                                                               |
| LOC38640 | 316.2    | 163      | 0          | 0          | -24.171    | 0.003827 | 0.515497  | -0.95597         | 2230082  | ILMN_200   | XM_35921 | ILMN_2538597 |                                                               |
| CDC20    | 897.5    | 464.6    | 0          | 0          | -15.2969   | 0.029533 | 0.51766   | -0.94992         | 4610722  | ILMN_211   | NM_0232  | ILMN_286     | Mus musci C87100; p55CDC; 2310042N09Rik                       |
| RPS6K1L  | 226.8    | 118.3    | 0          | 0          | -22.013    | 0.006291 | 0.521605  | -0.93897         | 3800327  | ILMN_214   | NM_1462  | ILMN_264     | Mus musci A830084F09Rik; MGC38756; AW04644C                   |
| ODZ4     | 106.5    | 55.6     | 0          | 0          | -14.8717   | 0.032571 | 0.522066  | -0.9377          | 3060382  | ILMN_194</ |          |              |                                                               |
