# Supplementary material for: Contributions of the RhoA guanine nucleotide exchange factor Net1 to polyoma middle T antigen-mediated mammary gland tumorigenesis and metastasis
Source: Springer Nature journal article supplement (doi:10.1186/s13058-018-0966-2), 2018-05-16
Supplement: MOESM5 [file 15769766]

|                       |          |         |   |   |          |          |          |             |          |          |          |          |          |          |
|-----------------------|----------|---------|---|---|----------|----------|----------|-------------|----------|----------|----------|----------|----------|----------|
| ILMN_251:Ppp2r2b      | 0.027969 | 0.88767 | 3 | 3 | 0.968964 | 3.614064 | 2.645101 | Higher in V | 0        | 0        | 2.906891 | 2.744161 | 4.321928 | 3.776104 |
| ILMN_122:Apaf1        | 0.028334 | 0.88767 | 3 | 3 | 1.295517 | 3.806798 | 2.511282 | Higher in V | 0.765535 | 0        | 3.121015 | 3.053111 | 3.981853 | 4.385431 |
| ILMN_277:Klf16        | 0.028795 | 0.88767 | 3 | 3 | 1.58257  | 4.078456 | 2.495886 | Higher in V | 0.925999 | 0.485427 | 3.336283 | 3.169925 | 4.177918 | 4.887525 |
| ILMN_261:Lce3f /// LC | 0.028917 | 0.88767 | 3 | 3 | 0.764261 | 3.384038 | 2.619778 | Higher in V | 0        | 2.292782 | 0        | 4.711495 | 3.336283 | 2.104337 |
| ILMN_258:Cpeb2        | 0.029125 | 0.88767 | 3 | 3 | 2.125939 | 4.871455 | 2.745515 | Higher in V | 0        | 2.944858 | 3.432959 | 5.266787 | 5.193772 | 4.153805 |
| ILMN_123:Arhgef15     | 0.030183 | 0.88767 | 3 | 3 | 0.981619 | 3.49939  | 2.517771 | Higher in V | 0        | 0        | 2.944858 | 3.336283 | 4.161888 | 3        |
| ILMN_124:Sprr4        | 0.030305 | 0.88767 | 3 | 3 | 0        | 3.473916 | 3.473916 | Higher in V | 0        | 0        | 0        | 6.179909 | 1.137504 | 3.104337 |
| ILMN_259:Kcnn2        | 0.03046  | 0.88767 | 3 | 3 | 3.887369 | 1.107309 | 2.78006  | Higher in V | 4.566815 | 3.405992 | 3.689299 | 0        | 3.321928 | 0        |
| ILMN_123:Olfir371     | 0.030763 | 0.88767 | 3 | 3 | 3.389139 | 0.845351 | 2.543788 | Higher in V | 2.321928 | 4.523562 | 3.321928 | 0        | 2.536053 | 0        |
| ILMN_285:Defb6        | 0.03086  | 0.88767 | 3 | 3 | 1.155325 | 4.151275 | 2.99595  | Higher in V | 0.765535 | 2.70044  | 0        | 6.098032 | 3.169925 | 3.185867 |
| ILMN_264:Rprm         | 0.031798 | 0.88767 | 3 | 3 | 1.665162 | 5.734722 | 4.06956  | Higher in V | 4.857981 | 0.137504 | 0        | 7.088523 | 5.495056 | 4.620586 |
| ILMN_122:Pan3         | 0.032153 | 0.88767 | 3 | 3 | 0.861654 | 3.29263  | 2.430976 | Higher in V | 0        | 0        | 2.584963 | 3.137504 | 4.307429 | 2.432959 |
| ILMN_125:Sp6          | 0.033468 | 0.88767 | 3 | 3 | 2.675637 | 6.05946  | 3.383823 | Higher in V | 2.169925 | 4.655352 | 1.201634 | 7.608809 | 6.507795 | 4.061776 |
| ILMN_124:Pkn3         | 0.033593 | 0.88767 | 3 | 3 | 0.981619 | 3.601215 | 2.619596 | Higher in V | 0        | 0        | 2.944858 | 3.666757 | 4.50462  | 2.632268 |
| ILMN_263:Psmc6        | 0.03382  | 0.88767 | 3 | 3 | 1.913822 | 4.308471 | 2.394649 | Higher in V | 0        | 3.419539 | 2.321928 | 4.255501 | 4.590961 | 4.078951 |
| ILMN_125:Cdsn         | 0.034218 | 0.88767 | 3 | 3 | 2.174312 | 4.883975 | 2.709663 | Higher in V | 3.596935 | 2.925999 | 0        | 5.649615 | 4.529821 | 4.472488 |
| ILMN_251:Zfp3612      | 0.034427 | 0.88767 | 3 | 3 | 3.814977 | 1.005974 | 2.809003 | Higher in V | 5.044394 | 2.678072 | 3.722466 | 3.017922 | 0        | 0        |
| ILMN_121:Amigo1       | 0.03469  | 0.88767 | 3 | 3 | 1.760319 | 4.389818 | 2.6295   | Higher in V | 0        | 1.432959 | 3.847997 | 4.643856 | 4.472488 | 4.053111 |
| ILMN_308:Whrn         | 0.034869 | 0.88767 | 3 | 3 | 0.993951 | 3.468557 | 2.474606 | Higher in V | 0        | 0        | 2.981853 | 4.224966 | 2.963474 | 3.217231 |
| ILMN_122:Wee1         | 0.034901 | 0.88767 | 3 | 3 | 0.819811 | 3.157496 | 2.337685 | Higher in V | 2.459432 | 0        | 0        | 2.887525 | 4.263034 | 2.321928 |
| ILMN_274:Prkd1        | 0.036816 | 0.88767 | 3 | 3 | 3.473098 | 1.040338 | 2.43276  | Higher in V | 3.510962 | 3.070389 | 3.837943 | 0        | 0        | 3.121015 |
| ILMN_253:Tmem45a      | 0.037873 | 0.88767 | 3 | 3 | 3.984684 | 1.206862 | 2.777821 | Higher in V | 4.185867 | 3.446256 | 4.321928 | 3.620586 | 0        | 0        |
| ILMN_297:LOC10050     | 0.038743 | 0.88767 | 3 | 3 | 1.07241  | 3.503854 | 2.431444 | Higher in V | 0        | 3.217231 | 0        | 3.485427 | 3.733354 | 3.292782 |
| ILMN_125:Elovl4       | 0.040111 | 0.88767 | 3 | 3 | 1.605192 | 5.306444 | 3.701252 | Higher in V | 0        | 4.137504 | 0.678072 | 7.369815 | 5.013462 | 3.536053 |
| ILMN_122:Fkbp6        | 0.041943 | 0.88767 | 3 | 3 | 3.452151 | 0.975333 | 2.476818 | Higher in V | 2.584963 | 4.523562 | 3.247928 | 0        | 0        | 2.925999 |
| ILMN_121:Cdkn2c       | 0.042359 | 0.88767 | 3 | 3 | 1.092662 | 4.091148 | 2.998486 | Higher in V | 0        | 3.277985 | 0        | 4.385431 | 5.402586 | 2.485427 |
| ILMN_123:Krt6b        | 0.042866 | 0.88767 | 3 | 3 | 0.379168 | 2.907064 | 2.527896 | Higher in V | 1.137504 | 0        | 0        | 4.958843 | 1.201634 | 2.560715 |
| ILMN_295:Kremen2      | 0.043823 | 0.88767 | 3 | 3 | 1.545251 | 4.116335 | 2.571084 | Higher in V | 0        | 1.137504 | 3.498251 | 5.213347 | 3.981853 | 3.153805 |
| ILMN_277:Tgm3         | 0.044359 | 0.88767 | 3 | 3 | 0        | 2.397687 | 2.397687 | Higher in V | 0        | 0        | 0        | 4.329124 | 2.378512 | 0.485427 |
| ILMN_121:Mmab         | 0.045253 | 0.88767 | 3 | 3 | 4.207507 | 1.846903 | 2.360604 | Higher in V | 4.57289  | 4.201634 | 3.847997 | 1.807355 | 0        | 3.733354 |
| ILMN_297:Sprr1a       | 0.047491 | 0.88767 | 3 | 3 | 3.349318 | 5.789654 | 2.440336 | Higher in V | 3.827819 | 2.827819 | 3.392317 | 7.667466 | 5.904484 | 3.797013 |
| ILMN_124:Kprp         | 0.047551 | 0.88767 | 3 | 3 | 0        | 3.818432 | 3.818432 | Higher in V | 0        | 0        | 0        | 6.464342 | 4.72792  | 0.263034 |
| ILMN_259:Tet1         | 0.047607 | 0.88767 | 3 | 3 | 0.810986 | 3.537088 | 2.726102 | Higher in V | 0        | 0        | 2.432959 | 4.857981 | 1.536053 | 4.217231 |
| ILMN_122:Casp12       | 0.048029 | 0.88767 | 3 | 3 | 1.045835 | 3.473098 | 2.427264 | Higher in V | 0        | 0        | 3.137504 | 4.070389 | 2.510962 | 3.837943 |
| ILMN_122:Agt          | 0.048224 | 0.88767 | 3 | 3 | 1.413438 | 4.467237 | 3.053799 | Higher in V | 0        | 4.240314 | 0        | 4.596935 | 5.104337 | 3.70044  |
| ILMN_296:Rufy3        | 0.049684 | 0.88767 | 3 | 3 | 1.051268 | 3.374224 | 2.322956 | Higher in V | 0        | 3.153805 | 0        | 2.744161 | 3.378512 | 4        |
