# Supplementary material for: Contributions of the RhoA guanine nucleotide exchange factor Net1 to polyoma middle T antigen-mediated mammary gland tumorigenesis and metastasis
Source: Springer Nature journal article supplement (doi:10.1186/s13058-018-0966-2), 2018-05-16

Zuo\_FigS2

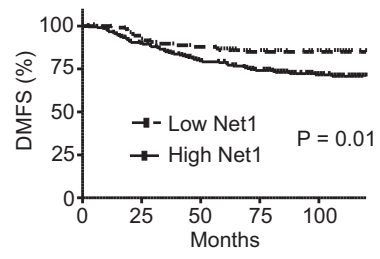

Supplement: MOESM6 [file 15769766]
